# Supplementary material for: Magnetite/graphene composites: microwave irradiation synthesis and enhanced cycling and rate performances for lithium ion batteries
Source: Royal Society of Chemistry journal article supplement (doi:10.1039/c0jm00638f), 2010-01-01
Supplement: c0jm00638f.pdf [file c0jm00638f.pdf]

**Magnetite/graphene composites: microwave irradiation synthesis and enhanced cycling and rate performances for lithium ion batteries**

**Ming Zhang, Danni Lei, Xiaoming Yin, Libao Chen, Qiuhong Li, Yanguo Wang  
and Taihong Wang\***

*Key Laboratory for Micro-Nano Optoelectronic Devices of Ministry of Education and  
State Key Laboratory for Chemo/Biosensing and Chemometrics, Hunan University,  
Changsha 410082, China*

---

\* Authors for correspondence email: [thwang@hnu.cn](mailto:thwang@hnu.cn)

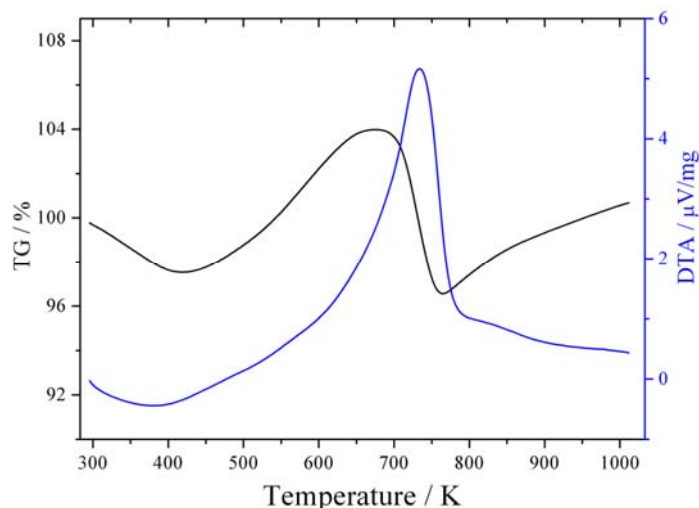

Figure S1. TGA and DTA traces of the as-synthesized  $\text{Fe}_3\text{O}_4$ /graphene composites (MGCs) (a heating rate of 10 K/min with an air flowrate of 10 ml/min). The TGA curve of MGCs displays a weight loss from 293 K followed by a weight gain between 423 and 673 K and again a weight loss from 673 followed by a weight gain between 766 and 1013 K. This complex curve results from the emersion of small molecule compounds and the redox of carbon and  $\text{Fe}^{2+}$ . The weight loss before 423 K, which is accompanied by an endothermic peak in the DTA curve, could be attributed to the elimination of absorbed/trapped water molecules or small molecule compounds. According to previous report <sup>[1]</sup>, the weight gain between 423 and 673 K arise from the oxidation of the magnetite, which is accompanied by one exothermic peak. It is well known that the graphene was oxidated by  $\text{O}_2$  beginning at 573 K <sup>[2]</sup> and the hematite was reduced by carbon monoxide above 573 K <sup>[3]</sup>. The weight loss between 673 and 766 K and an exothermic peak could be attributed to above reasons. The weight gain after 766 K could be attributed to the oxidation of  $\text{Fe}_3\text{O}_4$  again. The final products were the hematite.

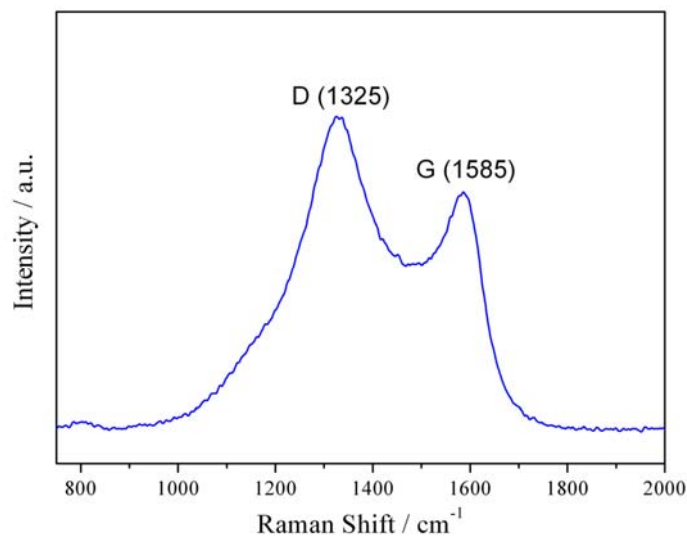

Figure S2. Raman spectra of MGCs. The peak at about 1585 cm<sup>-1</sup> (G band) corresponding to an E<sub>2g</sub> mode of graphite is related to the vibration of sp<sup>2</sup>-bonded carbon atoms in a 2-dimensional hexagonal lattice, while the peak at about 1325 cm<sup>-1</sup> (D band) is related to the defects and disorders in the hexagonal graphitic layers. The intensity ratio of the D to G band ( $I_D/I_G$ ) is calculated as 1.32 for the samples.

## References

- [1] A. J. V. Velzen and M. J. Dekkers, *Studia Geoph. et Geod.*, 1999, **43**, 1573.
- [2] A. B. Bourlinos, D. Gournis, D. Petridis, T. Szabó, A. Szeri and I. Dékány, *Langmuir*, 2003, **19**, 6050.
- [3] W. K. Jozwiak, E. Kaczmarek, T. P. Maniecki, W. Ignaczak and W. Maniukiewicz, *Appl. Catal. A: General*, 2007, **326**, 17.
